# Supplementary material for: Large-scale methane venting and clathrite-like structures recorded in the Late Miocene foredeep deposits of the northern Apennines (Marnoso arenacea Fm., Italy)
Source: Research Square preprint supplement (doi:10.21203/rs.3.rs-6980851/v1), 2025-07-24
Supplement: Supplementary file 1 [file a0a00d100d5f69125772daf1.xlsx]

## Sheet: Sheet1
Supplementary Information for the article: Large-scale methane venting and clathrite-like structures recorded in the Late Miocene foredeep deposits of the northern Apennines (Marnoso arenacea Fm., Italy) Simone Muzzioli1, Stefano Conti1, Claudio Argentino2*, Daniela Fontana1 1 Department of Chemical and Geological Sciences, University of Modena and Reggio Emilia, Modena, Italy 2 Department of Geo…
SEM-EDS spot analyses of various mineralogical components included in the seep carbonates from the basal lithofacies P1.
PR10 _1		wt%	wt%	wt%	wt%	wt%	wt%	wt%	wt%	wt%	wt%	wt%
	O	Na2O	MgO	Al2O3	SiO2	SO3	Cl	K2O	CaO	TiO2	FeO	BaO
1	0	0.42	1.29		0.67				97.63
2	0		34.24			1.26			64.5
3	0		34.19	5.41	11.4				45.9		3.1
4	0	0.51	3.38		79.88	0.88	0.28	5.25	4.97	4.85
5	0		4.12			24.81			4.93			66.14
Average	0	0.46	15.44	5.41	30.65	8.98	0.28	5.25	43.59	4.85	3.1	66.14
Deviation	0	0.06	17.17	0	42.97	13.71	0	0	39.84	0	0	0
PR10 _2		wt%	wt%	wt%	wt%	wt%	wt%
	O	MgO	SiO2	SO3	Cl	CaO	FeO
1	0	1.42				97.28	1.31
2	0	37.54		0.81		61.65
3	0	37.91	7.85			54.25
4	0	23.37	1.44	2.04	1.57	71.58
5	0	40.95	1.23		0.45	57.37
6	0	38.08				61.92
Average	0	29.88	3.51	1.43	1.01	67.34	1.31
Deviation	0	15.27	3.76	0.87	0.8	15.79	0
PR10 _3		wt%	wt%	wt%	wt%	wt%
	O	MgO	SiO2	SO3	Cl	CaO
1	0	1.32				98.68
2	0	38.85				61.15
3	0	38.31		1.09	1.37	59.23
4	0	27.74	0.93	1.56	0.95	68.81
5	0	29.12				70.88
6	0	41.91	5.98			52.11
Average	0	29.54	3.46	1.33	1.16	68.48
Deviation	0	14.94	3.57	0.33	0.3	16.28
PR10 _4		wt%	wt%	wt%	wt%	wt%	wt%	wt%
	O	MgO	SiO2	SO3	Cl	CaO	CuO	ZnO
1	0	1.94				98.06
2	0	10.49	2.65	5.41	1.66	74.62	2.82	2.35
3	0	36.96				63.04
Average	0	16.47	2.65	5.41	1.66	78.57	2.82	2.35
Deviation	0	18.26	0	0	0	17.84	0	0	0
PR8_1		wt%	wt%	wt%
	O	MgO	SiO2	CaO
1	0	2.24		97.76
2	0	33.48	2.17	64.34
3	0	39.4		60.6
Average	0	25.04	2.17	74.24
Deviation	0	19.97	0	20.46
PR8_2
Formula	mass%	Atom%	Sigma	Net	K ratio	Line
O	2.93	7.01	0.07	2940	0.0069358	K
Mg	0.31	0.48	0.03	1728	0.0007903	K
S	51.13	60.97	0.08	481401	0.29114	K
Ca	1.09	1.04	0.03	8031	0.0063158	K
Mn	0.35	0.24	0.04	1301	0.0019374	K
Fe	44.2	30.26	0.13	146883	0.2547	K
Total	100	100
PR9_1
1
Formula	mass%	Atom%	Sigma	Net	K ratio	Line
O	5.68	13.05	0.06	8791	0.0207404	K
Mg	0.28	0.43	0.02	2404	0.0010997	K
S	50.09	57.46	0.07	708661	0.428582	K
Ca	0.45	0.41	0.02	5016	0.0039448	K
Fe	43.5	28.65	0.1	217257	0.37673	K
Total	100	100
2
Formula	mass%	mol%	Cation	Sigma	Net	K ratio	Line
O
MgO	27.1	34.92	7.16	0.14	76424	0.0349582	K
Al2O3	2.96	1.51	0.62	0.08	7292	0.0033685	K
SiO2	16.16	13.97	2.87	0.15	40769	0.0204255	K
CaO	52.72	48.84	10.02	0.17	208654	0.16409	K
FeO	1.06	0.76	0.16	0.06	1717	0.0029772	K
Total	100	100	20.82
PR9_4		wt%	wt%	wt%	wt%	wt%
	O	MgO	Al2O3	SiO2	CaO	FeO
1	0	20.27	1.18	48.24	30.3
2	0	30.01		4.71	65.28
3	0	35.58		3.47	60.22	0.73
4	0	35.72		5.8	58.48
5	0	26.64		23.28	50.08
6	0	34.39		3.69	61.92
Average	0	30.44	1.18	14.87	54.38	0.73
Deviation	0	0 6.1	3 0.0	0 18.0	3 12.84	0	0
pr9_4b		wt%	wt%	wt%	wt%
	O	MgO	SiO2	CaO	FeO
1	0	34.03	0.99	64.97
2	0	44.82		55.18
3	0	37.06	3.61	56.43	2.9
Average	0	38.64	2.3	58.86	2.9
Deviation	0	5.56	1.85	5.33	0
